# Supplementary material for: Clinical Decision Support Systems for Pressure Ulcer Management: Systematic Review
Source: PubMed Central journal article supplement (PMC7600011; doi:10.2196/21621), 2020-10-16
Supplement: medinform_v8i10e21621_app1.pdf [file medinform_v8i10e21621_app1.pdf]

**Multimedia Appendix 1.** The search strategy.

---

| <b>Strategy</b> | <b>Population/Condition: Pressure ulcer</b>                                                                                                                                                                                 |
|-----------------|-----------------------------------------------------------------------------------------------------------------------------------------------------------------------------------------------------------------------------|
| <b>#1</b>       | <i>"Pressure ulcer" OR "pressure ulcers" OR "pressure wound" OR "pressure injuries" OR "pressure injury"</i><br><b>AND</b>                                                                                                  |
|                 | <b>Intervention: Clinical Decision Support System</b>                                                                                                                                                                       |
| <b>#2</b>       | <i>"Decision support systems, clinical" OR "Clinical Decision Support System *" OR "Clinical decision support" OR "clinical decision Making" OR "CDS" OR "CDSS" OR "algorithm" OR " Decision Making, Computer-Assisted"</i> |

---
