# Supplementary material for: Clinical Decision Support Systems for Pressure Ulcer Management: Systematic Review
Source: PubMed Central journal article supplement (PMC7600011; doi:10.2196/21621), 2020-10-16
Supplement: medinform_v8i10e21621_app2.pdf [file medinform_v8i10e21621_app2.pdf]

**Multimedia Appendix 2.** Reasons for records exclusion in the screening and eligibility phase.

---

**Screening**

- Context other than only PU<sup>a</sup>: 195
- Context other than CDSS<sup>b</sup>: 176
- Sensor or system of pressure detection/inclination on bed, cushion, or wheelchair: 49
- Image processing/mining, multispectral images: 29
- Guidelines: 18
- Algorithm not applied in CDSS computerized: 11
- Mobile application: 8
- Not in English: 8
- Systematic review: 5
- Care Dependency Scale: 4
- Study with animals: 4
- Letters/Editorial: 4
- Education tool: 2
- CDSS not applied in clinical practice: 1
- Protocol: 1

**Records excluded: 515**

**Eligibility**

- Secondary studies or abstracts of primary studies included: 7
- CDSS not applied in clinical practice: 3
- Non CDSS description: 1

**Records excluded: 11**

---

<sup>a</sup>Pressure ulcer

<sup>b</sup>Clinical Decision Support Systems
